# Supplementary material for: Fertility and Iron Bioaccumulation in Drosophila melanogaster Fed with Magnetite Nanoparticles Using a Validated Method
Source: MDPI journal article supplement (doi:10.3390/molecules26092808), 2021-05-10
Supplement: s1 [file s1]

**Supplementary Materials:** The following are available online: Table SI-1.1: Statistical analysis of fly fertility after exposure to Fe<sub>3</sub>O<sub>4</sub>NPs, Ch-Fe<sub>3</sub>O<sub>4</sub>NPs, and control; Table SI-1.2: Tukey's HSD test results for control, Fe<sub>3</sub>O<sub>4</sub>NPs, and Ch-Fe<sub>3</sub>O<sub>4</sub>NPs groups; Table SI-2.1: Linear fit, upper, and lower confidence limits (UCL and LCL) for each iron concentration within the studied ranges; Table SI-3.1: Iron concentrations in individual culture medium components.

### SI-1: Fertility: Statistical analysis

**Table SI-1.1** Statistical analysis of fly fertility after exposure to Fe<sub>3</sub>O<sub>4</sub>NPs, Ch-Fe<sub>3</sub>O<sub>4</sub>NPs, and control

| NP Concentration | Fe <sub>3</sub> O <sub>4</sub> NPs |       |                |     |       |                            | Ch-Fe <sub>3</sub> O <sub>4</sub> NPs |       |                |      |      |                            |
|------------------|------------------------------------|-------|----------------|-----|-------|----------------------------|---------------------------------------|-------|----------------|------|------|----------------------------|
|                  | N                                  | Mean  | Std. Deviation | F   | Sig.  | Duncan's test <sup>a</sup> | N                                     | Mean  | Std. Deviation | F    | Sig. | Duncan's test <sup>a</sup> |
| 0 ppm            | 10                                 | 119.7 | 37.256         | 1.5 | 0.208 | A                          | 10                                    | 119.7 | 32.511         | 22.9 | 0,00 | A                          |
| 100 ppm          | 10                                 | 94.2  | 34.653         |     |       | A                          | 10                                    | 24.4  | 16.001         |      |      | B                          |
| 250 ppm          | 10                                 | 91.4  | 34.1           |     |       | A                          | 10                                    | 34.2  | 20.357         |      |      | B                          |
| 500 ppm          | 10                                 | 93    | 33.86          |     |       | A                          | 10                                    | 32.2  | 25.046         |      |      | B                          |
| 1000 ppm         | 10                                 | 85.7  | 27.92          |     |       | B                          | 10                                    | 42.7  | 25.456         |      |      | B                          |

<sup>a</sup> Means with the same letter are not significantly different (p < 0.05)

**Table SI-1.2.** Tukey's HSD test results for control, Fe<sub>3</sub>O<sub>4</sub>NPs, and Ch-Fe<sub>3</sub>O<sub>4</sub>NPs groups

| Groups (I)                            | Groups (J)                            | Mean Difference (I-J) |
|---------------------------------------|---------------------------------------|-----------------------|
| Control group                         | Fe <sub>3</sub> O <sub>4</sub> NPs    | 28.625*               |
|                                       | Ch-Fe <sub>3</sub> O <sub>4</sub> NPs | 86.325*               |
| Fe <sub>3</sub> O <sub>4</sub> NPs    | Control group                         | -28.625*              |
|                                       | Ch-Fe <sub>3</sub> O <sub>4</sub> NPs | 57.700*               |
| Ch-Fe <sub>3</sub> O <sub>4</sub> NPs | Control group                         | -86.325*              |
|                                       | Fe <sub>3</sub> O <sub>4</sub> NPs    | -57.700*              |

\* The mean difference is significant at the 0.05 level.

### SI-2: Linearity assessment for iron quantification by atomic absorption spectrophotometry

Table SI-2.1 shows that the linear fit was acceptable for both concentration ranges. It also indicates that as iron concentration increases, confidence limits broaden; iron range between 3.000 and 5.000 mg L<sup>-1</sup> showed the highest UCL.

**Table SI-2.1.** Linear fit, upper, and lower confidence limits (UCL and LCL) for each iron concentration within the studied ranges

| Low Range                                         |       |        | High Range                                        |       |        |
|---------------------------------------------------|-------|--------|---------------------------------------------------|-------|--------|
| $y = x - 1 \cdot 10^{-4}$ R <sup>2</sup> = 0.9996 |       |        | $y = x + 2 \cdot 10^{-4}$ R <sup>2</sup> = 0.9982 |       |        |
| [Fe]std mg L <sup>-1</sup>                        | UCL   | LCL    | [Fe]std mg L <sup>-1</sup>                        | UCL   | LCL    |
| 0.000                                             | 0.030 | -0.030 | 0.000                                             | 0.235 | -0.234 |
| 0.125                                             | 0.159 | 0.090  | 1.000                                             | 1.424 | 0.576  |
| 0.250                                             | 0.289 | 0.211  | 2.000                                             | 2.614 | 1.387  |
| 0.500                                             | 0.549 | 0.451  | 3.000                                             | 3.803 | 2.197  |
| 1.000                                             | 1.068 | 0.932  | 4.000                                             | 4.993 | 3.007  |

|       |       |       |       |       |       |
|-------|-------|-------|-------|-------|-------|
| 1.500 | 1.587 | 1.413 | 5.000 | 6.182 | 3.818 |
|-------|-------|-------|-------|-------|-------|

### SI-3: Determination of iron concentration in culture medium components

Components of the culture medium, which formed the basis of the Fe<sub>3</sub>O<sub>4</sub>NPs suspensions, are shown in Table SI-3.1. Most of the components had an iron content below the LOD, except the jelly; although the jelly proportion in the medium was very low, this was not an issue in the final culture medium.

**Table SI-3.1.** Iron concentrations in individual culture medium components

| <b>Ingredient</b> | <b>[Fe] (mg kg<sup>-1</sup>)</b> |
|-------------------|----------------------------------|
| Banana            | <LOD                             |
| Lemon             | <LOD                             |
| Jelly             | 17.6 ± 0.34                      |
| Yeast             | <LOD                             |
| Nipagin           | <LOD                             |
